# Supplementary material
Source: publisher figshare collection journal article supplement (https://tandf.figshare.com/ndownloader/files/15628775)
Supplement: Supplementary file 1 [file 15628775]

# Supplement to “Estimation in the Single Change-point Hazard Function for interval-censored Data with a Cure Fraction”

Bing Wang, Xiaoguang Wang and Lixin Song

## ARTICLE HISTORY

Compiled March 7, 2019

This document provides detailed proofs for the asymptotic properties given in Section 4. Firstly, we demonstrate the proof of Theorem 1.

**Proof of Theorem 1.** Define  $Z_n(t) = \sum_{i=1}^n I(R_i \geq t)$ . When  $t < \tau_H$ ,  $\frac{Z_n(t)}{n} \rightarrow 1 - H(\infty, t)$  almost surely by the strong law of large numbers, and  $1 - H(\infty, t) > 0$ . Hence,  $Z_n(t) \rightarrow \infty$ , which implies  $Y_{(n)} \rightarrow \tau_H$ . In addition, we have that  $F(\tau_H) \leq p < 1$ . By the conclusion of [1], we obtain

$$\sup_{t \in R} |\hat{F}_n(t) - F(t)| \rightarrow 0$$

in probability. Since  $Y_{(n)} \leq \tau_H$  almost surely, it follows that  $|\hat{F}_n(Y_{(n)}) - F(Y_{(n)})| \rightarrow 0$  in probability. When  $\tau_H < \infty$ ,  $Y_{(n)} \rightarrow \tau_H$  in probability and  $F$  is continuous at  $\tau_H$ . Thus

$$\hat{F}_n(Y_{(n)}) = F(Y_{(n)}) + o_p(1) \rightarrow F(\tau_H) = pF_0(\tau_H)$$

in probability. When  $\tau_H = \infty$ ,  $Y_{(n)} \rightarrow \infty$  in probability, so  $\hat{F}_n(Y_{(n)}) \rightarrow p = pF_0(\tau_H)$  in probability, again. Note that

$$\tau_{F_0} = \sup\{t : F_0(t) < 1\} = \sup\{t : F(t) < p\}.$$

Hence  $\hat{F}_n(Y_{(n)}) \rightarrow p$  if and only if  $F_0(\tau_H) = 1$ , that is  $\tau_{F_0} \leq \tau_H$ , and then the theorem follows.  $\square$

**Proof of Theorem 2.** Define

$$X_n(t) = \left\{ \frac{\hat{\Lambda}_n^*(D) - \hat{\Lambda}_n^*(t)}{D - t} - \frac{\hat{\Lambda}_n^*(t) - \hat{\Lambda}_n^*(0)}{t} \right\} g\{t(D - t)\}, \quad 0 < t < D,$$

and

$$X_n^0(t) = \left\{ \frac{\hat{\Lambda}_n^{*0}(D) - \hat{\Lambda}_n^{*0}(t)}{D - t} - \frac{\hat{\Lambda}_n^{*0}(t) - \hat{\Lambda}_n^{*0}(0)}{t} \right\} g\{t(D - t)\}, \quad 0 < t < D,$$

where  $\hat{\Lambda}_n^*(t) = -\log[-\frac{1}{\hat{p}}\{\exp(-\hat{\Lambda}_n(t)) - 1 + \hat{p}\}]$ ,  $\hat{\Lambda}_n(t)$  is obtained by  $\hat{F}_n$ , and  $\hat{\Lambda}_n^{*0}(t) = -\log[-\frac{1}{p}\{\exp(-\hat{\Lambda}_n) - 1 + p\}]$ . Notice that  $\Lambda^*(0) = \hat{\Lambda}_n^{*0}(0) = \Lambda(0) = 0$ . Then  $X(t) = t^{q-1}(D-t)^{q-1}\{t\Lambda^*(D) - D\Lambda^*(t)\}$ . For any  $\varepsilon > 0$ , let  $c_1 \in (0, \min\{X(\tau) - X(\tau - \varepsilon), X(\tau) - X(\tau + \varepsilon)\})$  relying on  $\varepsilon, \tau_1, \tau_2, p, \theta$ . Then, if  $|t - \tau| > \varepsilon$ , we have  $X(\tau) - X(\tau + \varepsilon) > c_1$ . Noting that  $X_n(t)$  attains its maximum at  $\hat{\tau}_n$ , for sufficiently large  $n$ , we have

$$\begin{aligned}
& P(|\hat{\tau} - \tau| > \varepsilon) \\
& \leq P(X(\tau) - X(\hat{\tau}) > c_1) \\
& \leq P(X(\tau) - X(\hat{\tau}) + X_n(\hat{\tau}) - X_n(\tau) > c_1) \\
& \leq P(|X_n(\hat{\tau}) - X(\hat{\tau})| + |X(\tau) - X_n(\tau)| > c_1) \\
& = P(|X_n(\hat{\tau}) - X(\hat{\tau})| + |X(\tau) - X_n(\tau)| > c_1, \sup_{\tau_1 < t < \tau_2} |X_n(t) - X(t)| > \frac{c_1}{2}) \\
& \quad + P(|X_n(\hat{\tau}) - X(\hat{\tau})| + |X(\tau) - X_n(\tau)| > c_1, \sup_{\tau_1 < t < \tau_2} |X_n(t) - X(t)| \leq \frac{c_1}{2}) \\
& \leq P(\sup_{\tau_1 < t < \tau_2} |X_n(t) - X(t)| > \frac{c_1}{2}) + P(\emptyset) \\
& \leq P(\sup_{\tau_1 < t < \tau_2} |X_n(t) - X_n^0(t)| > \frac{c_1}{4}) + P(\sup_{\tau_1 < t < \tau_2} |X_n^0(t) - X(t)| > \frac{c_1}{4}) \\
& \leq P(D\tau_1^{q-1}(D - \tau_2)^{q-1} \sup_{\tau_1 < t < \tau_2} |U_n^0(t)| + \tau_2^q(D - \tau_2)^{q-1}U_n^0(D) > \frac{c_1}{4}) \\
& \quad + P(\sup_{\tau_1 < t < \tau_2} |X_n(t) - X_n^0(t)| > \frac{c_1}{4}).
\end{aligned}$$

We can obtain the last inequality by

$$\begin{aligned}
X_n^0(t) - X(t) &= t^{q-1}(D-t)^{q-1}[t\{\hat{\Lambda}_n^{*0}(D) - \Lambda_n^*(D)\} - D\{\hat{\Lambda}_n^{*0}(D) - \Lambda_n^*(D)\}] \\
&= t^{q-1}(D-t)^{q-1}U_n^0(D) - t^{q-1}(D-t)^{q-1}U_n^0(t),
\end{aligned}$$

where  $U_n^0 = \hat{\Lambda}_n^{*0}(t) - \Lambda^*(t)$ . Consequently, there exist  $c_2 > 0$  and  $c_3 > 0$ , depending on  $c_1, \tau_1, \tau_2, D$  and  $q$ , such that

$$\begin{aligned}
& P(|\hat{\tau} - \tau| > \varepsilon) \\
& \leq P(\sup_{\tau_1 < t < \tau_2} |U_n^0(t)| > c_2) + P(U_n^0(D) > c_3) + P(\sup_{\tau_1 < t < \tau_2} |X_n(t) - X_n^0(t)| > \frac{c_1}{4}) \\
& = I_1 + I_2 + I_3.
\end{aligned} \tag{1}$$

From the definition of  $\Lambda^*(t)$ , we find that

$$\begin{aligned}
|U_n^0(t)| &= |\log(-\frac{1}{p}\{e^{-\hat{\Lambda}_n(t)} - 1 + p\}) - \log(-\frac{1}{p}\{e^{-\Lambda(t)} - 1 + p\})| \\
&= \left| \frac{e^{-\alpha(t)}}{e^{-\alpha(t)} - 1 + p} \right| \cdot |\hat{\Lambda}_n(t) - \Lambda(t)|,
\end{aligned} \tag{2}$$

where  $\alpha(t)$  is between  $\hat{\Lambda}(t)$  and  $\Lambda(t)$ . Thus,  $\exp(-\alpha(t))$  lies on the segment between  $\hat{S}(t) = 1 - \hat{F}_n(t)$  and  $S(t) = 1 - F(t) = 1 - pF_0(t)$ . For interval-censored data, according to [1],  $\sup_{t \in [0, \tau_{F_0}]} |\hat{F}_n(t) - F(t)| \rightarrow 0$  almost surely for  $\tau_{F_0} \leq \tau_G$ . Thus for

any  $\alpha < 1 - pF_0(D)$ ,

$$\exp(-\alpha(t)) > [1 - F(D)] - \alpha = [1 - pF_0(D)] - \alpha = \phi(D),$$

provided that  $\tau_{F_0} > D$ . It follows (2) that

$$|U_n^0(t)| \leq \frac{1}{\phi(D) - 1 + p} |\hat{\Lambda}_n(t) - \Lambda(t)| = \frac{1}{\phi(D) - 1 + p} |U_n(t)|.$$

By the assumption

$$h(l, r) > 0, \text{ if } 0 < F_0(l) < F_0(r) < 1. \quad (3)$$

and the likelihood function  $L(\beta, \theta, p, \tau | \mathbf{O}_i, i = 1, \dots, n)$ , there exists  $c_4 > 0$  relying on  $c_1, c_2, \tau_1, \tau_2, D, q, p$  and  $F_0$ , satisfying

$$\begin{aligned} I_1 &\leq P\left(\sup_{\tau_1 < t < \tau_2} |U_n(t)| > c_4, \tau_2 \leq Y_{(n)}\right) + P(Y_{(n)} < \tau_2) \\ &\leq P\left(\sup_{\tau_1 < t < \tau_2} |U_n(t \wedge Y_{(n)})| > c_4\right) + \prod_{i=1}^n P(R_i < \tau_2). \end{aligned} \quad (4)$$

We know that

$$\hat{\Lambda}_n(t \wedge Y_{(n)}) - \Lambda(t \wedge Y_{(n)}) = \log \frac{1 - \hat{F}_n(t \wedge Y_{(n)})}{1 - F(t \wedge Y_{(n)})}. \quad (5)$$

By  $P(\lim_{n \rightarrow \infty} \sup_{t \in \mathbb{R}} |\hat{F}_n(t) - F(t)| = 0) = 1$  obtained by [1], the first term on the right side of last inequality of (4) converges to 0 as  $n \rightarrow \infty$ . Next, by (1),  $I_2 \leq P(|U_n(D)| > c_3, Y_{(n)} \geq D) + P(Y_{(n)} < D)$ . Similarly,  $I_2$  converges to 0 as  $n \rightarrow \infty$ .

In order to prove  $I_3 \rightarrow 0$ , we rewrite  $X_n(t)$  and  $X_n^0(t)$  as

$$X_n(t) = t^{q-1}(D - t)^{q-1}[t\{\hat{\Lambda}_n^*(t) - \hat{\Lambda}_n^*(t)\} - (D - t)\hat{\Lambda}_n^*(t)], \quad (6)$$

and

$$X_n^0(t) = t^{q-1}(D - t)^{q-1}[t\{\hat{\Lambda}_n^{*0}(D) - \hat{\Lambda}_n^{*0}(t)\} - (D - t)\hat{\Lambda}_n^{*0}(t)]. \quad (7)$$

By (4) and (5),

$$\begin{aligned} I_3 &\leq P\left(\sup_{\tau_1 < t < \tau_2} |X_n(t) - X_n^0(t)| > \frac{c_1}{4}, Y_{(n)} \geq D\right) + P(Y_{(n)} < D) \\ &\leq P\left(2 \sup_{\tau_1 < t < \tau_2} |\hat{\Lambda}_n^{*0}(t) - \hat{\Lambda}_n^{*0}(t)| \tau_2^q (D - \tau_2)^{q-1} > \frac{c_4}{8}\right) \\ &\quad + P\left(\sup_{\tau_1 < t < \tau_2} |\hat{\Lambda}_n^*(t) - \hat{\Lambda}_n^{*0}(t)| \tau_2^{q-1} (D - \tau_2)^q > \frac{c_4}{8}\right) + P(Y_{(n)} < D) \\ &= I_{31} + I_{32} + \prod_{i=1}^n P(R_i < D). \end{aligned}$$

We can see that

$$I_{31} \leq P(|\log(\hat{p}) - \log(p)| + \sup_{\tau_1 < t < \tau_2} \left| \log \frac{e^{\hat{\Lambda}_n(t)} - 1 + \hat{p}}{e^{\hat{\Lambda}_n(t)} - 1 + p} \right| > \frac{c_4}{8}).$$

Since  $\hat{p}$  converges to  $p$  in probability, and  $\sup_{0 < t < D} |\hat{\Lambda}_n(t) - \Lambda(t)| \rightarrow 0$ , we have  $I_{31} \rightarrow 0$ . Similarly,  $I_{32} \rightarrow 0$ . This completes the proof of Theorem 2.  $\square$

In order to show the proof of Theorems 3-5, we need some lemmas. We first state some conditions from [2].

**Condition 1.**  $\sqrt{n}P_n \dot{l}_\mu(\mu_0, \nu_0) = O_{p^*}(1)$ .

For i.i.d. observations, Condition 2 holds automatically if  $P \dot{l}_\mu^2(\mu_0, \nu_0) < \infty$  by the central limit theorem.

**Condition 2.**

$$\frac{|\sqrt{n}(P_n - P) \dot{l}_\mu(\hat{\mu}, \hat{\nu}) - \sqrt{n}(P_n - P) \dot{l}_\mu(\mu_0, \nu_0)|}{1 + \sqrt{n}|\hat{\mu} - \mu_0|} = o_{p^*}(1),$$

where  $|\hat{\mu} - \mu_0| = o_{p^*}(1)$  and  $|\hat{\nu} - \nu_0| = o_{p^*}(1)$ .

**Condition 3.**  $\sqrt{n}P \ddot{l}_{\mu\nu}(\mu_0, \nu_0)|\hat{\nu} - \nu_0| = O_p(1)$ .

When  $\hat{\nu}$  is a  $\sqrt{n}$ -consistent, this condition holds automatically.

**Condition 4.** (Smoothness Condition) For  $(\mu, \nu) \in D_n$ ,

$$|P \dot{l}_\mu(\mu, \nu) - P \dot{l}_\mu(\mu_0, \nu_0) - P \ddot{l}_{\mu\mu}(\mu_0, \nu_0)(\mu - \mu_0) - P \ddot{l}_{\mu\nu}(\mu_0, \nu_0)(\nu - \nu_0)| = o(|\mu - \mu_0|) + o(|\nu - \nu_0|),$$

where  $D_n = \{(\mu, \nu) : |\mu - \mu_0| \leq \eta_n \downarrow 0, |\nu - \nu_0| \leq c n^{1/2}\}$  for some constant  $c$ .

**Condition 5.** Under the probability  $P$ ,

$$\sqrt{n} \begin{bmatrix} (P_n - P) \dot{l}_\mu(\mu_0, \nu_0) \\ \hat{\nu} - \nu_0 \end{bmatrix} \xrightarrow{d} \Lambda = \begin{bmatrix} \Lambda_1 \\ \Lambda_2 \end{bmatrix}, \quad (8)$$

where  $\Lambda \sim N_4(0, \Sigma)$  with  $\Sigma$  being a  $4 \times 4$  positive definite matrix.

The following Lemmas 1-4 are due to [2], which also correspond to Theorem 6.1 in [3] for the semi-parametric model with a infinite-dimensional parameter space.

**Lemma 1.** Suppose that  $\mu_0$  is the unique solution to  $P \dot{l}_\mu(\mu, \nu_0) = 0$  and  $\hat{\nu}$  such that  $|\hat{\nu} - \nu_0| = o_{p^*}(1)$ . If

$$\sup_{\mu \in \Theta_1, |\nu - \nu_0| \leq \eta_n} \frac{|P_n \dot{l}_\mu(\mu, \nu) - P \dot{l}_\mu(\mu, \nu_0)|}{1 + |P_n \dot{l}_\mu(\mu, \nu)| + |P \dot{l}_\mu(\mu, \nu_0)|} = o_{p^*}(1)$$

for every sequence  $\{\eta_n\} \downarrow 0$ , then  $\hat{\mu}$  almost surely solving  $P_n \dot{l}_\mu(\hat{\mu}, \hat{\nu}) = 0$  converges in outer probability to  $\mu_0$ .

**Lemma 2.** Suppose that the class of functions  $\{\psi(\boldsymbol{\mu}, \boldsymbol{\nu}) : |\boldsymbol{\mu} - \boldsymbol{\mu}_0| < \gamma, |\boldsymbol{\nu} - \boldsymbol{\nu}_0| < \gamma\}$  is  $P$ -Donsker for some  $\gamma > 0$ , and that  $P|\psi(\boldsymbol{\mu}, \boldsymbol{\nu}|X) - \psi(\boldsymbol{\mu}_0, \boldsymbol{\nu}_0|X)|^2 \rightarrow 0$ , as  $|\boldsymbol{\mu} - \boldsymbol{\mu}_0| \rightarrow 0$  and  $|\boldsymbol{\nu} - \boldsymbol{\nu}_0| \rightarrow 0$ . If  $\hat{\boldsymbol{\mu}} \xrightarrow{P^*} \boldsymbol{\mu}_0$  and  $\hat{\boldsymbol{\nu}} \xrightarrow{P^*} \boldsymbol{\nu}_0$ , then

$$|\sqrt{n}(P_n - P)(\psi(\hat{\boldsymbol{\mu}}, \hat{\boldsymbol{\nu}}) - \psi(\boldsymbol{\mu}_0, \boldsymbol{\nu}_0))| = o_{P^*}(1).$$

We should note that the conditions of Lemma 2 imply Condition 2. However, there is a set of simple sufficient conditions for Condition 2, thus we will verify the conditions of Lemma 2 in the proof of Theorem 5 below.

**Lemma 3.** Suppose that  $\hat{\boldsymbol{\mu}}$  satisfies  $P_n \dot{l}_{\boldsymbol{\mu}}(\hat{\boldsymbol{\mu}}, \hat{\boldsymbol{\nu}}) = o_{P^*}(n^{-1/2})$  and is a consistent estimator of  $\boldsymbol{\mu}$ , which is the unique point for which  $P \dot{l}_{\boldsymbol{\mu}}(\boldsymbol{\mu}, \boldsymbol{\nu}_0) = 0$ , and  $\hat{\boldsymbol{\nu}}$  is an estimator of  $\boldsymbol{\nu}_0$  satisfying  $|\hat{\boldsymbol{\nu}} - \boldsymbol{\nu}_0| = O_{P^*}(n^{-1/2})$ . Then under Conditions 1-4,  $\sqrt{n}(\hat{\boldsymbol{\mu}} - \boldsymbol{\mu}_0) = O_{P^*}(1)$ .

**Lemma 4.** Suppose that  $\boldsymbol{\mu}_0$  is the unique solution to  $P \dot{l}_{\boldsymbol{\mu}}(\boldsymbol{\mu}, \boldsymbol{\nu}_0) = 0$  and  $\hat{\boldsymbol{\nu}}$  is an estimator of  $\boldsymbol{\nu}_0$  satisfying  $|\hat{\boldsymbol{\nu}} - \boldsymbol{\nu}_0| = O_{P^*}(1)$ . Then under Conditions 2-5,  $\sqrt{n}(\hat{\boldsymbol{\mu}} - \boldsymbol{\mu}_0) \xrightarrow{d} \{-P \ddot{l}_{\boldsymbol{\mu}\boldsymbol{\mu}}(\boldsymbol{\mu}_0, \boldsymbol{\nu}_0)\}^{-1} N_4(0, \mathbf{V})$ , where  $\mathbf{V} = \text{Var}(\Lambda_1 + P \ddot{l}_{\boldsymbol{\mu}\boldsymbol{\nu}}(\boldsymbol{\mu}_0, \boldsymbol{\nu}_0) \Lambda_2)$ .

**Lemma 5.** For  $\dot{l}_{\beta}(\boldsymbol{\mu}, \boldsymbol{\nu}|\mathbf{O})$  and  $\dot{l}_{\theta}(\boldsymbol{\mu}, \boldsymbol{\nu}|\mathbf{O})$  defined in (12) and (13), if  $|\boldsymbol{\mu} - \boldsymbol{\mu}_0| \leq \eta_n \downarrow 0$  and  $|\boldsymbol{\nu} - \boldsymbol{\nu}_0| \leq cn^{-1/2}$ , then  $P(\dot{l}_{\boldsymbol{\mu}}(\boldsymbol{\mu}, \boldsymbol{\nu}) - \dot{l}_{\boldsymbol{\mu}}(\boldsymbol{\mu}_0, \boldsymbol{\nu}_0))^2 = o_{P^*}(1)$ .

Proof. See Lemma 5 of [5].

**Proof of Theorem 3.** To prove the consistency of the pseudo estimator  $\hat{\boldsymbol{\mu}}$ , we mainly need

$$\sup_{\boldsymbol{\mu} \in \boldsymbol{\Theta}_1, |\boldsymbol{\nu} - \boldsymbol{\nu}_0| \leq \eta_n} |P_n \dot{l}_{\boldsymbol{\mu}}(\boldsymbol{\mu}, \boldsymbol{\nu}) - P \dot{l}_{\boldsymbol{\mu}}(\boldsymbol{\mu}, \boldsymbol{\nu}_0)| = o_{P^*}(1)$$

for every sequence  $\{\eta_n\} \downarrow 0$ . Then the consistency of  $\hat{\boldsymbol{\mu}}$  follows from Lemma 1. Since

$$|P_n \dot{l}_{\boldsymbol{\mu}}(\boldsymbol{\mu}, \boldsymbol{\nu}) - P \dot{l}_{\boldsymbol{\mu}}(\boldsymbol{\mu}, \boldsymbol{\nu}_0)| \leq |(P_n - P) \dot{l}_{\boldsymbol{\mu}}(\boldsymbol{\mu}, \boldsymbol{\nu})| + |P(\dot{l}_{\boldsymbol{\mu}}(\boldsymbol{\mu}, \boldsymbol{\nu}) - \dot{l}_{\boldsymbol{\mu}}(\boldsymbol{\mu}, \boldsymbol{\nu}_0))|,$$

and  $P \ddot{l}_{\boldsymbol{\mu}\boldsymbol{\mu}}(\boldsymbol{\mu}, \boldsymbol{\nu}|\mathbf{O})$  obviously tends to zero when  $|\boldsymbol{\nu} - \boldsymbol{\nu}_0| \leq \alpha \downarrow 0$ . We need to show that the class of the functions  $F_{\alpha} \equiv \{\dot{l}_{\boldsymbol{\mu}}(\boldsymbol{\mu}, \boldsymbol{\nu}) : \boldsymbol{\mu} \in \boldsymbol{\Theta}_1 \subset \mathbb{R}^2, |\boldsymbol{\nu} - \boldsymbol{\nu}_0| \leq \eta_n\}$  is a VC-class for some  $\eta_n > 0$ , where  $\boldsymbol{\Theta}_1 = \{\boldsymbol{\mu} = (\beta, \theta)' : \beta \geq A_1, \theta \geq A_2\}$ . This implies that the uniform strong law of large numbers holds, i.e.,  $\sup_{f \in F_n} (P_n - P)f \xrightarrow{P} 0$ ; See [4], Chap. 2.6-2.7, for details. Let  $F_{1\alpha} = \{I_{(-\infty, -\tau]}(R) : |\tau - \tau_0| \leq \alpha_1\}$ , and  $F_{2\alpha} = \{I_{(-\infty, -\tau]}(L) : |\tau - \tau_0| \leq \alpha_1\}$ . Then the VC-indexes of the class of functions  $F_{1\alpha}$  and  $F_{2\alpha}$  are both 2 by Example 2.6.1 of [4]. Thus the class of functions

$$\{I_{(-\infty, \pi]}(L)I_{(\pi, \infty)}(R) \frac{Re^{-\beta R - \theta(R - \tau)} - Le^{-\beta L}}{e^{-\beta L} - e^{-\beta R - \theta(R - \tau)}} : \boldsymbol{\mu} \in \boldsymbol{\Theta}_1 \subset \mathbb{R}^2, |\boldsymbol{\nu} - \boldsymbol{\nu}_0| \leq \alpha\}$$

is Donsker by Lemma 2.6.18 and Example 2.10.8 of [4], because  $(Re^{-\beta R - \theta(R - \tau)} - Le^{-\beta L})/(e^{-\beta L} - e^{-\beta R - \theta(R - \tau)})$  is bounded. It is similar to show that the other classes of functions are also Donsker. Thus the class of functions of  $F_{\alpha}$  is VC-class by applying Example 2.10.7 and Theorem 2.10.6 of [4]. Finally, by Lemma 1,  $\hat{\boldsymbol{\mu}}$  is consistent.  $\square$

**Proof of Theorem 4.** We first verify the stochastic equicontinuity condition:

$$|\sqrt{n}(P_n - P)\{\dot{l}_\mu(\hat{\mu}, \hat{\nu}) - \dot{l}_\mu(\mu_0, \nu_0)\}| = o_{p^*}(1). \quad (9)$$

Let  $F_\gamma = \{\dot{l}_\mu(\mu, \nu) - \dot{l}_\mu(\mu_0, \nu_0) : |\mu - \mu_0| \leq \gamma, |\nu - \nu_0| \leq \gamma\}$ . Similar to the proof of Theorem 1 we can show that  $F$  is a VC-class. Thus (9) follows from Lemma 2 together with Lemma 5. Next, the smoothness Condition 4 holds by  $P\dot{l}_\mu(\mu, \nu|\mathbf{O}) < \infty$ ,  $P\ddot{l}_{\mu\mu}(\mu, \nu|\mathbf{O}) < \infty$ , and Lemma 5, and  $P_n\dot{l}_\mu(\mu_0, \nu_0)$  converges in distribution to a normal random variable by the central limit theorem. Thus  $\sqrt{n}|\hat{\mu} - \mu| = O_{p^*}(1)$  by Lemma 3.  $\square$

**Proof of Theorem 5.** By the consistency of  $\hat{p}$  and  $\hat{\tau}$  together with the Slutsky's theorem and the central limit theorem, we can show that (8) holds for normally distributed  $\Lambda_1$  with mean zero and positive variance. Hence by Lemma 4,  $\sqrt{n}(\hat{\mu} - \mu_0)$  is asymptotically normal with mean 0 and variance  $\{P\ddot{l}_{\mu\mu}(\mu_0, \nu_0)\}^{-2}\mathbf{V}$ .  $\square$

## References

- [1] P. Groeneboom and J. Wellner, *Information Bounds and Nonparametric Maximum Likelihood Estimation*, Oberwolfach Seminars, Birkhäuser Basel, 1992.
- [2] H. Hu, *Large sample theory for pseudo-maximum likelihood estimates in semiparametric models*, Ph.D. diss., University of Washington, 1998.
- [3] J. Huang, *Efficient estimation for the proportional hazards model with interval censoring*, The Annals of Statistics 24 (1996), pp. 540–568.
- [4] A.W. Van Der Vaart and J.A. Wellner, *Weak Convergence and Empirical Processes*, Springer, 1996.
- [5] X. Zhao, X. Wu, and X. Zhou, *A change-point model for survival data with long-term survivors*, Statistica Sinica 19 (2009), pp. 377–390.
